# Supplementary material for: Slug-Dependent Upregulation of L1CAM Is Responsible for the Increased Invasion Potential of Pancreatic Cancer Cells following Long-Term 5-FU Treatment
Source: PubMed Central journal article supplement (PMC4393253; doi:10.1371/journal.pone.0123684), 2015-04-10

Supplementary Figure S1. Cluster analysis of gene expression in B1V and Nt. 607 genes with log2 change >1 were considered.

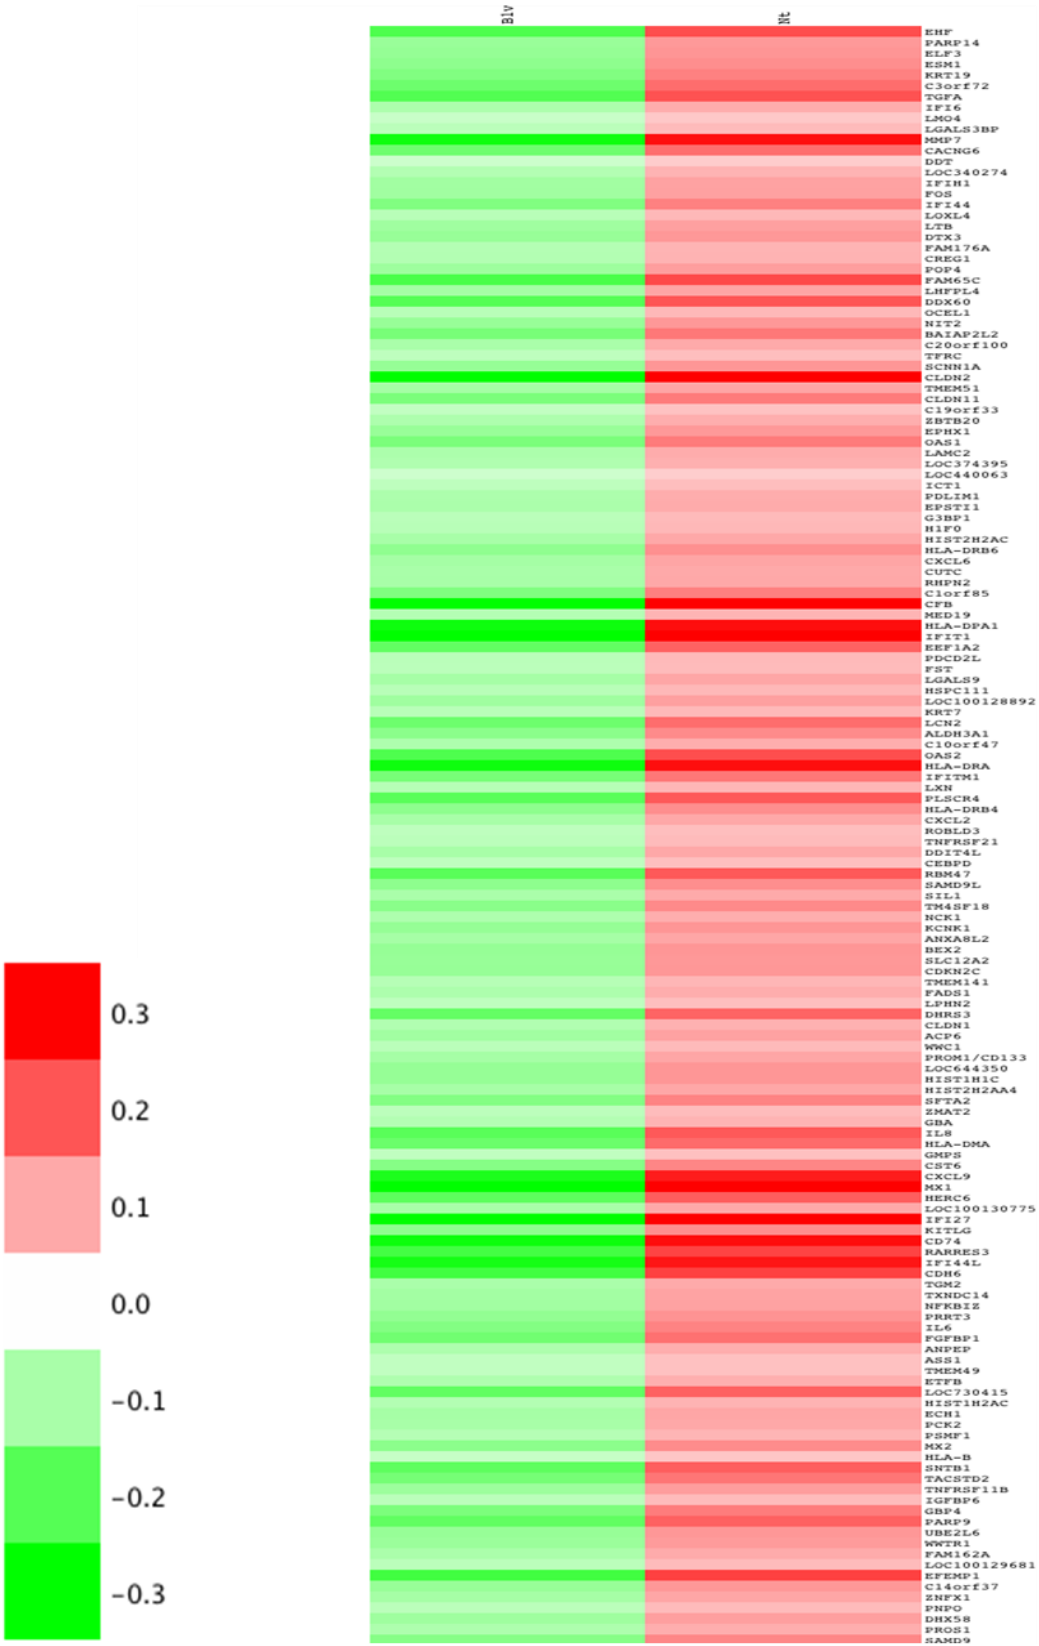

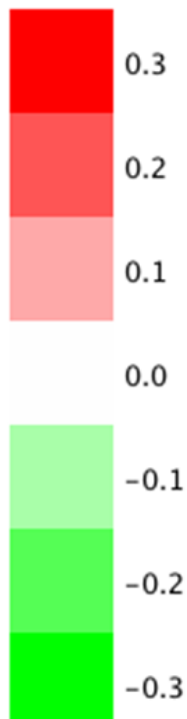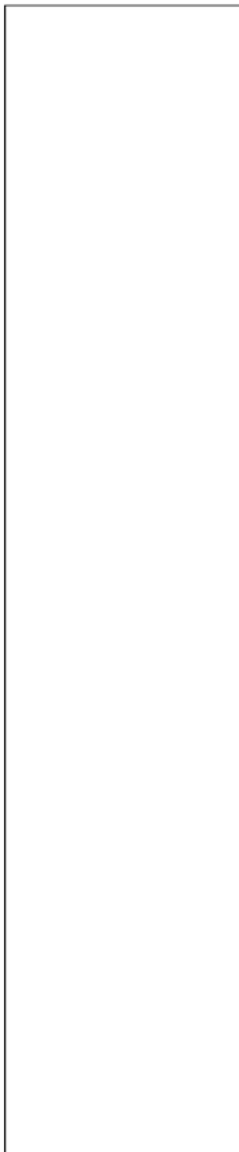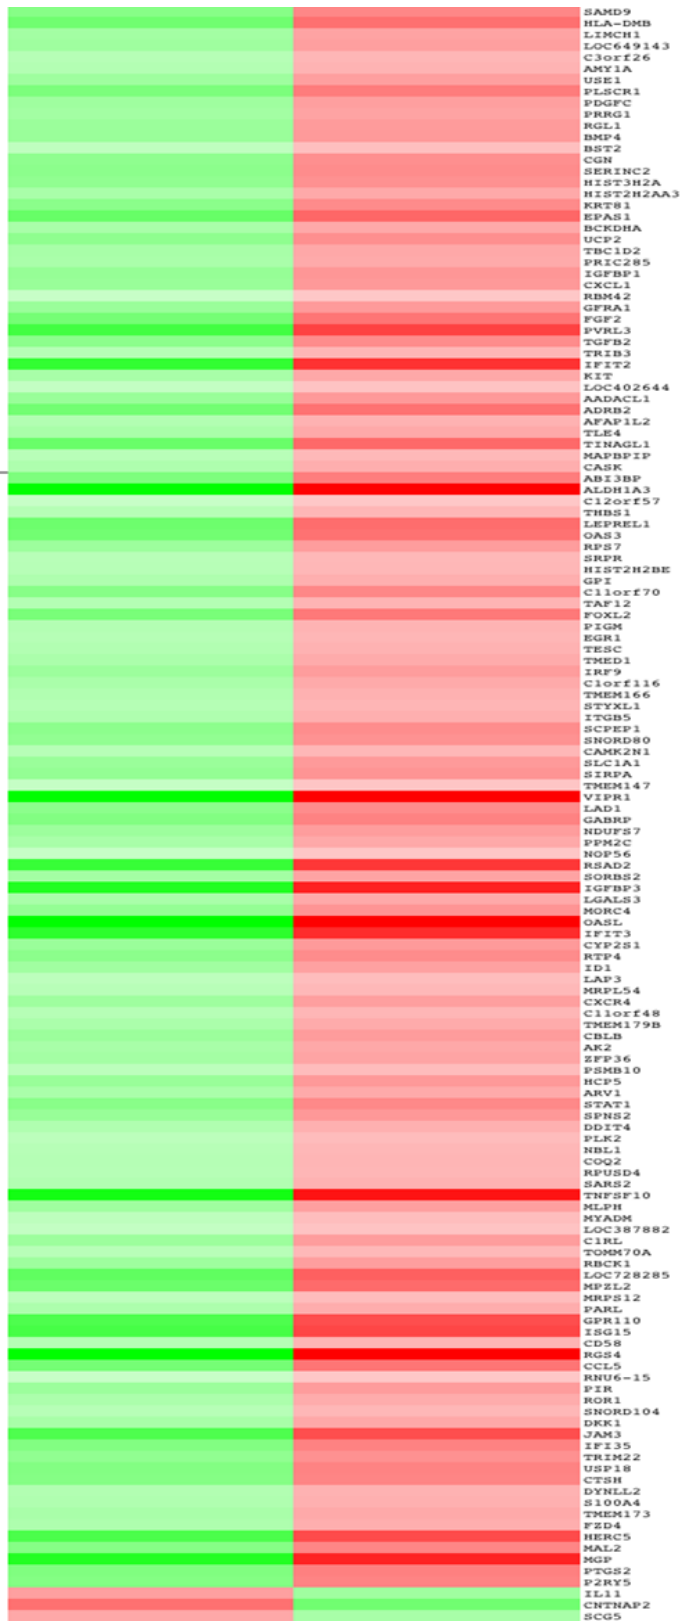

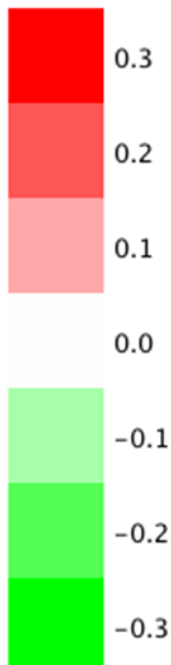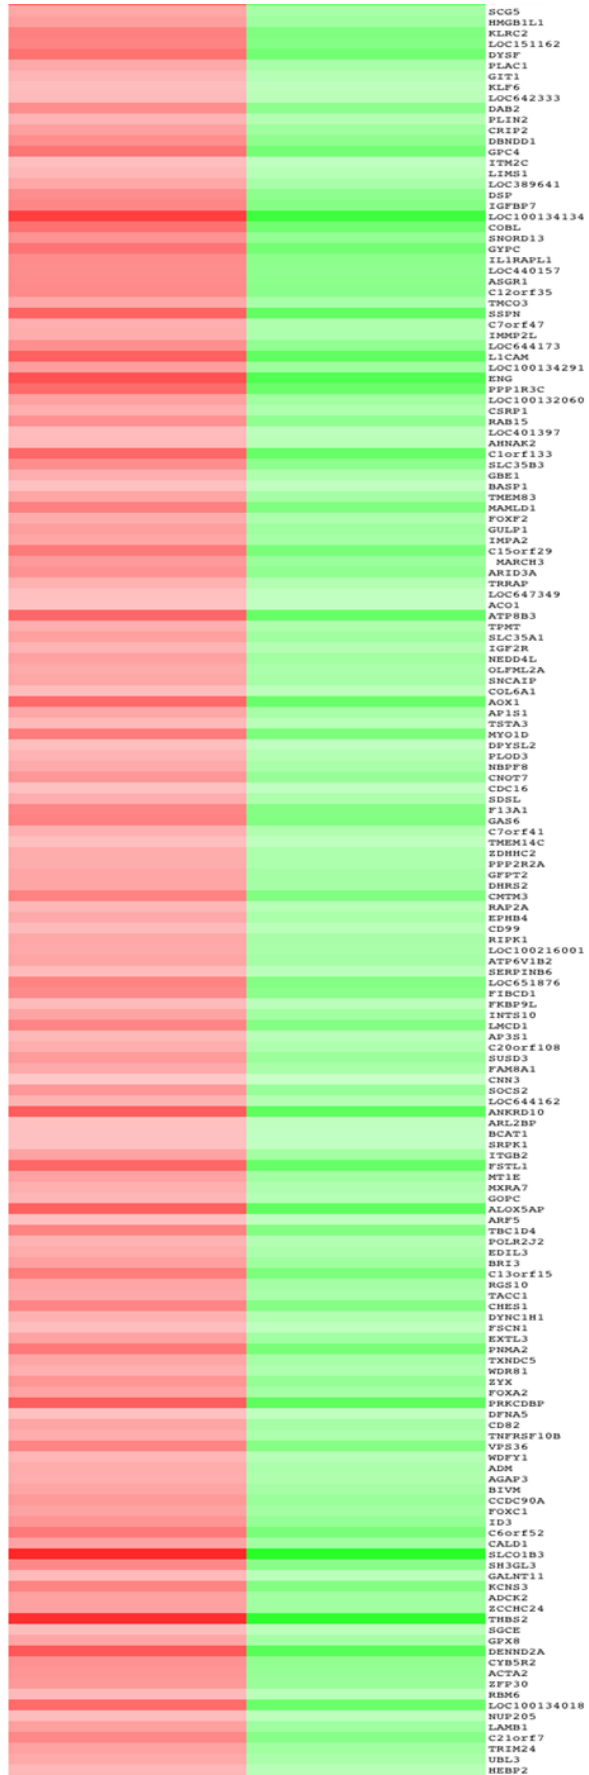

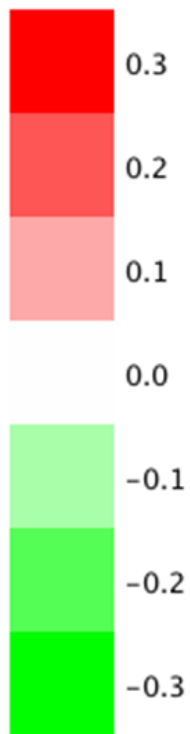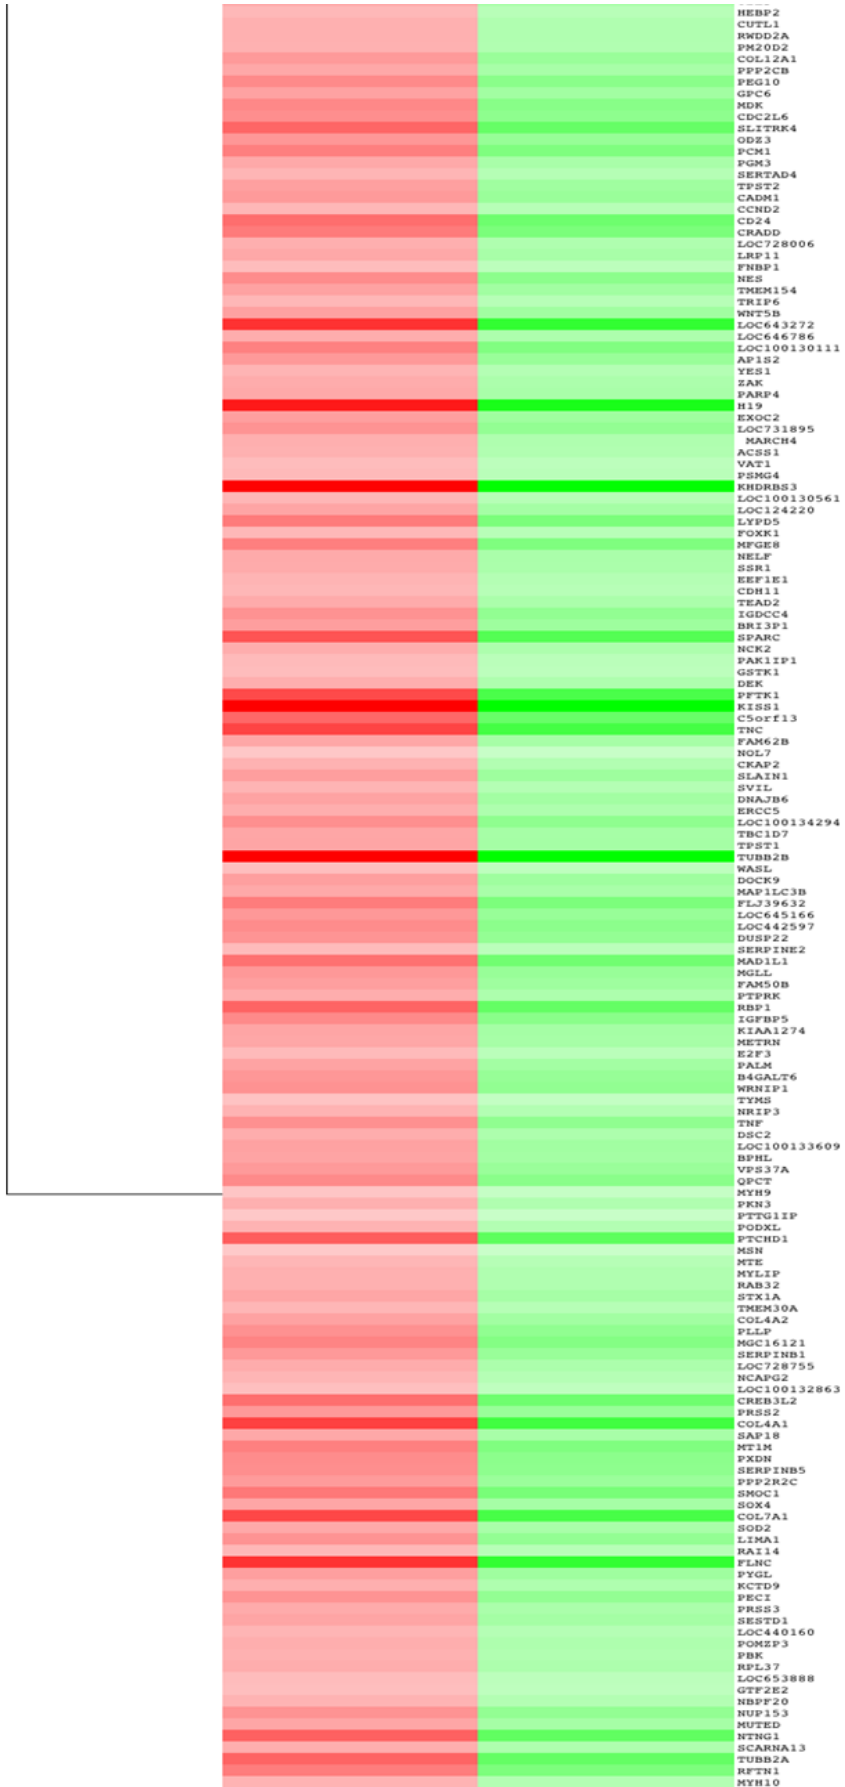

Supplement: pone.0123684.s001.pdf [file pone.0123684.s001.pdf]
