# Supplementary material for: Slug-Dependent Upregulation of L1CAM Is Responsible for the Increased Invasion Potential of Pancreatic Cancer Cells following Long-Term 5-FU Treatment
Source: PubMed Central journal article supplement (PMC4393253; doi:10.1371/journal.pone.0123684), 2015-04-10
Supplement: pone.0123684.s002.pdf [file pone.0123684.s002.pdf]

**Supplementary Table S1.** List of 319 genes upregulated at least 2-fold in the chemoresistant cell line B1V versus the chemosensitive cell line Nt. (P <0.05) (FC; fold change.)

| List of 319 genes upregulated at least 2-fold in the chemoresistant cell line B1V versus the chemosensitive cell line Nt |              |              |              |           |              |              |              |              |              |
|--------------------------------------------------------------------------------------------------------------------------|--------------|--------------|--------------|-----------|--------------|--------------|--------------|--------------|--------------|
| Gene name                                                                                                                | FC<br>B1V/Nt | Gene name    | FC<br>B1V/Nt | Gene name | FC<br>B1V/Nt | Gene name    | FC<br>B1V/Nt | Gene name    | FC<br>B1V/Nt |
| PLAC1                                                                                                                    | 2,00         | LOC440160    | 2,16         | HEBP2     | 2,35         | IL1RAPL1     | 2,68         | C5orf13      | 3,62         |
| COL6A1                                                                                                                   | 2,00         | CNN3         | 2,17         | MYH10     | 2,36         | SOD2         | 2,68         | LOC100134018 | 3,65         |
| GALNT11                                                                                                                  | 2,01         | LOC642333    | 2,17         | DOCK9     | 2,36         | DSP          | 2,68         | GPC4         | 3,67         |
| FOXF2                                                                                                                    | 2,01         | KLF6         | 2,17         | EEF1E1    | 2,36         | TPST1        | 2,69         | PNMA2        | 3,69         |
| CDC16                                                                                                                    | 2,01         | RIPK1        | 2,17         | TMEM14C   | 2,36         | LIMA1        | 2,69         | SLITRK4      | 3,72         |
| ZDHHHC2                                                                                                                  | 2,01         | LOC124220    | 2,17         | BASP1     | 2,36         | LOC100134294 | 2,69         | LOC151162    | 3,73         |
| MXRA7                                                                                                                    | 2,02         | KCTD9        | 2,18         | TRIP6     | 2,37         | F13A1        | 2,71         | CHES1        | 3,80         |
| PKN3                                                                                                                     | 2,02         | ITM2C        | 2,18         | PODXL     | 2,37         | BRI3P1       | 2,71         | NTNG1        | 3,83         |
| ACSS1                                                                                                                    | 2,02         | IMMP2L       | 2,18         | PPP2CB    | 2,37         | FIBCD1       | 2,71         | MFGE8        | 3,86         |
| NRIP3                                                                                                                    | 2,02         | LOC728006    | 2,18         | PRSS3     | 2,38         | SLC35A1      | 2,72         | PTCHD1       | 3,89         |
| RBM6                                                                                                                     | 2,02         | SNCAIP       | 2,18         | FAM50B    | 2,38         | QPCT         | 2,73         | MAD1L1       | 3,90         |
| SCG5                                                                                                                     | 2,03         | SERPINE2     | 2,19         | PPP2R2A   | 2,38         | SSR1         | 2,74         | ALOX5AP      | 3,91         |
| FOXK1                                                                                                                    | 2,03         | GULP1        | 2,19         | STX1A     | 2,39         | SH3GL3       | 2,76         | GAS6         | 3,91         |
| AGAP3                                                                                                                    | 2,03         | CDH11        | 2,19         | ODZ3      | 2,39         | MGLL         | 2,77         | IGFBP7       | 3,91         |
| RAP2A                                                                                                                    | 2,03         | GSTK1        | 2,19         | TMCO3     | 2,39         | DUSP22       | 2,79         | COBL         | 3,94         |
| GTF2E2                                                                                                                   | 2,03         | SESTD1       | 2,20         | POXA2     | 2,40         | TACC1        | 2,80         | RFTNG1       | 3,99         |
| GOPC                                                                                                                     | 2,03         | POLR2J2      | 2,20         | DYNC1H1   | 2,40         | PLLP         | 2,81         | PCM1         | 4,06         |
| FBNP1                                                                                                                    | 2,03         | LOC644162    | 2,20         | INTS10    | 2,40         | FAM62B       | 2,81         | C12orf35     | 4,08         |
| SCARNA13                                                                                                                 | 2,03         | C7orf41      | 2,20         | SGCE      | 2,40         | SOX4         | 2,81         | SSPN         | 4,09         |
| SRPK1                                                                                                                    | 2,04         | IGF2R        | 2,20         | ID3       | 2,41         | MT1E         | 2,82         | PRKCDBP      | 4,16         |
| ARL2BP                                                                                                                   | 2,04         | SAP18        | 2,21         | EXOC2     | 2,42         | LOC651876    | 2,84         | L1CAM        | 4,24         |
| FKBP9L                                                                                                                   | 2,04         | NELF         | 2,21         | COL12A1   | 2,42         | MT1M         | 2,84         | PPP1R3C      | 4,47         |
| SERTAD4                                                                                                                  | 2,04         | RAI14        | 2,22         | SUSD3     | 2,42         | DNAJB6       | 2,87         | SPARC        | 4,58         |
| CUTL1                                                                                                                    | 2,05         | PALM         | 2,22         | MAP1LC3B  | 2,43         | HMGB1L1      | 2,87         | C13orf15     | 4,64         |
| LIMS1                                                                                                                    | 2,05         | DSC2         | 2,22         | TEAD2     | 2,44         | DEK          | 2,89         | C1orf133     | 4,75         |
| NCAPG2                                                                                                                   | 2,06         | ERCC5        | 2,22         | YES1      | 2,44         | KCNS3        | 2,90         | ANKRD10      | 4,76         |
| PAK1IP1                                                                                                                  | 2,06         | CD82         | 2,22         | TNF       | 2,44         | NES          | 2,92         | TUBB2A       | 4,77         |
| MTE                                                                                                                      | 2,06         | POMZP3       | 2,22         | BIVM      | 2,44         | CCDC90A      | 2,93         | DYSF         | 4,78         |
| BCAT1                                                                                                                    | 2,06         | SLAIN1       | 2,23         | TBC1D7    | 2,45         | SLC35B3      | 2,93         | CREB3L2      | 4,79         |
| PLIN2                                                                                                                    | 2,06         | UBL3         | 2,23         | PRSS2     | 2,45         | LOC440157    | 2,97         | ENG          | 4,93         |
| SDSL                                                                                                                     | 2,06         | PM20D2       | 2,23         | RAB32     | 2,46         | KLRC2        | 3,00         | PFTK1        | 4,93         |
| LOC653888                                                                                                                | 2,06         | NBPF8        | 2,23         | LRP11     | 2,46         | PYGL         | 3,01         | CD24         | 5,02         |
| MARCH4                                                                                                                   | 2,07         | WDFY1        | 2,23         | ZFP30     | 2,47         | DBNDD1       | 3,01         | DENND2A      | 5,13         |
| DFNA5                                                                                                                    | 2,07         | MUTED        | 2,23         | EPHB4     | 2,48         | CNOT7        | 3,01         | COL4A1       | 5,35         |
| PBK                                                                                                                      | 2,07         | TRIM24       | 2,23         | FSCN1     | 2,49         | MYO1D        | 3,03         | RBP1         | 5,40         |
| TSTA3                                                                                                                    | 2,07         | GFPT2        | 2,24         | CALD1     | 2,49         | TPST2        | 3,03         | LOC100134134 | 5,62         |
| AHNAK2                                                                                                                   | 2,07         | MYLIP        | 2,24         | FOXC1     | 2,49         | MAMLD1       | 3,05         | FSTL1        | 5,65         |
| PSMG4                                                                                                                    | 2,07         | PLOD3        | 2,25         | IGDCC4    | 2,49         | C6orf52      | 3,07         | COL7A1       | 5,73         |
| WDR81                                                                                                                    | 2,07         | TNFRSF10B    | 2,25         | CRIP2     | 2,49         | CDC2L6       | 3,09         | TNC          | 6,15         |
| TPMT                                                                                                                     | 2,08         | LOC401397    | 2,25         | LOC731895 | 2,50         | ZYX          | 3,09         | FLNC         | 6,34         |
| MSN                                                                                                                      | 2,08         | TYMS         | 2,25         | CYB5R2    | 2,50         | DAB2         | 3,10         | THBS2        | 6,51         |
| RPL37                                                                                                                    | 2,08         | MYH9         | 2,25         | ZCCHC24   | 2,50         | AP1S2        | 3,11         | SLCO1B3      | 7,20         |
| WASL                                                                                                                     | 2,08         | PPP2R2C      | 2,26         | LOC644173 | 2,50         | LYPD5        | 3,11         | LOC643272    | 8,06         |
| GIT1                                                                                                                     | 2,08         | LOC646786    | 2,26         | CSRP1     | 2,50         | LOC100130111 | 3,13         | H19          | 8,10         |
| LOC647349                                                                                                                | 2,08         | CKAP2        | 2,26         | CCND2     | 2,51         | LAMB1        | 3,14         | KHDRBS3      | 12,87        |
| NOL7                                                                                                                     | 2,09         | GPX8         | 2,26         | ITGB2     | 2,51         | NUP153       | 3,17         | TUBB2B       | 14,10        |
| VAT1                                                                                                                     | 2,09         | TMEM30A      | 2,27         | C20orf108 | 2,51         | SERPINB1     | 3,18         | KISS1        | 16,28        |
| PTTG1IP                                                                                                                  | 2,09         | NBPF20       | 2,27         | BPHL      | 2,53         | TBC1D4       | 3,23         |              |              |
| TMEM83                                                                                                                   | 2,09         | KIAA1274     | 2,28         | IMPA2     | 2,53         | MGC16121     | 3,23         |              |              |
| METRNL                                                                                                                   | 2,09         | AP3S1        | 2,29         | CADM1     | 2,54         | BRI3         | 3,23         |              |              |
| LOC728755                                                                                                                | 2,09         | IL11         | 2,30         | VPS37A    | 2,55         | GYPC         | 3,24         |              |              |
| SVIL                                                                                                                     | 2,10         | ZAK          | 2,31         | ATP6V1B2  | 2,57         | PECI         | 3,26         |              |              |
| FAM8A1                                                                                                                   | 2,11         | MARCH3       | 2,31         | AP1S1     | 2,59         | C15orf29     | 3,27         |              |              |
| ARF5                                                                                                                     | 2,12         | LOC100130561 | 2,31         | RGS10     | 2,59         | FLJ39632     | 3,27         |              |              |
| NUP205                                                                                                                   | 2,13         | GBE1         | 2,32         | ARID3A    | 2,60         | LOC645166    | 3,29         |              |              |
| CD99                                                                                                                     | 2,14         | PGM3         | 2,33         | B4GALT6   | 2,60         | VPS36        | 3,32         |              |              |
| SERPINB6                                                                                                                 | 2,14         | C7orf47      | 2,33         | ASGR1     | 2,60         | C21orf7      | 3,39         |              |              |
| LOC389641                                                                                                                | 2,14         | LOC100132060 | 2,33         | SERPINB5  | 2,61         | LOC442597    | 3,40         |              |              |
| E2F3                                                                                                                     | 2,14         | LOC100216001 | 2,33         | ADM       | 2,62         | WRNIP1       | 3,41         |              |              |
| EDIL3                                                                                                                    | 2,14         | EXTL3        | 2,34         | NEDD4L    | 2,64         | CMTM3        | 3,50         |              |              |
| LOC100133609                                                                                                             | 2,14         | GPC6         | 2,34         | ACTA2     | 2,64         | SMOC1        | 3,51         |              |              |
| COL4A2                                                                                                                   | 2,15         | NCK2         | 2,34         | TXNDC5    | 2,64         | CNTNAP2      | 3,51         |              |              |
| RWDD2A                                                                                                                   | 2,15         | TMEM154      | 2,34         | SOCS2     | 2,64         | PEG10        | 3,52         |              |              |
| DHRS2                                                                                                                    | 2,16         | DPYSL2       | 2,34         | PXDN      | 2,65         | CRADD        | 3,56         |              |              |
| LOC100132863                                                                                                             | 2,16         | LOC100134291 | 2,34         | IGFBP5    | 2,65         | MDK          | 3,58         |              |              |
| WNT5B                                                                                                                    | 2,16         | PTPRK        | 2,34         | PARP4     | 2,66         | LMCD1        | 3,58         |              |              |
| ACO1                                                                                                                     | 2,16         | OLFML2A      | 2,35         | RAB15     | 2,66         | ATP8B3       | 3,59         |              |              |
| TRRAP                                                                                                                    | 2,16         | ADCK2        | 2,35         | SNORD13   | 2,67         | AOX1         | 3,60         |              |              |
