# Supplementary material for: Slug-Dependent Upregulation of L1CAM Is Responsible for the Increased Invasion Potential of Pancreatic Cancer Cells following Long-Term 5-FU Treatment
Source: PubMed Central journal article supplement (PMC4393253; doi:10.1371/journal.pone.0123684), 2015-04-10
Supplement: pone.0123684.s003.pdf [file pone.0123684.s003.pdf]

**Supplementary Table S2.** List of 288 genes downregulated at least 2-fold in the chemoresistant cell line B1V versus the chemosensitive cell line Nt. (P <0.05) (FC; fold change.)

| List of 288 genes downregulated at least 2-fold in the chemoresistant cell line B1V versus the chemosensitive cell line Nt. |           |           |           |              |           |              |           |           |           |
|-----------------------------------------------------------------------------------------------------------------------------|-----------|-----------|-----------|--------------|-----------|--------------|-----------|-----------|-----------|
| Gene name                                                                                                                   | FC B1V/Nt | Gene name | FC B1V/Nt | Gene name    | FC B1V/Nt | Gene name    | FC B1V/Nt | Gene name | FC B1V/Nt |
| IFI27                                                                                                                       | 0,02      | CCL5      | 0,29      | ELF3         | 0,39      | TFRC         | 0,45      | CXCL2     | 0,49      |
| CFB                                                                                                                         | 0,04      | SAMD9     | 0,30      | SCNN1A       | 0,39      | SORBS2       | 0,45      | ASS1      | 0,49      |
| RGS4                                                                                                                        | 0,05      | SERINC2   | 0,31      | HCP5         | 0,39      | LOC649143    | 0,45      | G3BP1     | 0,49      |
| MX1                                                                                                                         | 0,05      | BMP4      | 0,31      | GPI          | 0,39      | USE1         | 0,45      | MYADM     | 0,49      |
| CLDN2                                                                                                                       | 0,06      | AADACL1   | 0,31      | PARL         | 0,39      | RPUSD4       | 0,45      | DDT       | 0,50      |
| IFIT1                                                                                                                       | 0,07      | UCP2      | 0,31      | C20orf100    | 0,39      | FAM162A      | 0,46      | LOC340274 | 0,50      |
| VIPR1                                                                                                                       | 0,07      | PROM1     | 0,31      | RBCK1        | 0,39      | LOC100128892 | 0,46      | KIT       | 0,50      |
| MMP7                                                                                                                        | 0,07      | MAL2      | 0,32      | HLA-DRB6     | 0,39      | PCK2         | 0,46      | TMEM141   | 0,50      |
| TNFSF10                                                                                                                     | 0,07      | ABI3BP    | 0,32      | PDLIM1       | 0,39      | FST          | 0,46      | ICT1      | 0,50      |
| ALDH1A3                                                                                                                     | 0,08      | HIST1H1C  | 0,32      | SIRPA        | 0,39      | C1orf116     | 0,46      | HIST2H2BE | 0,50      |
| CD74                                                                                                                        | 0,08      | DKK1      | 0,32      | WWTR1        | 0,40      | TOMM70A      | 0,46      | RBM42     | 0,50      |
| OASL                                                                                                                        | 0,09      | OAS1      | 0,32      | EGR1         | 0,40      | BST2         | 0,46      | SRPR      | 0,50      |
| HLA-DRA                                                                                                                     | 0,09      | GBP4      | 0,32      | CAMK2N1      | 0,40      | ROBLD3       | 0,46      | LOC440063 | 0,50      |
| IFI44L                                                                                                                      | 0,09      | IL6       | 0,32      | CYP2S1       | 0,40      | TESC         | 0,46      | S100A4    | 0,50      |
| MGP                                                                                                                         | 0,10      | FOXL2     | 0,32      | TMEM179B     | 0,40      | C3orf26      | 0,46      | HSPC111   | 0,50      |
| ISG15                                                                                                                       | 0,10      | BAIAP2L2  | 0,32      | PRRG1        | 0,40      | PSMF1        | 0,46      | FZD4      | 0,50      |
| IGFBP3                                                                                                                      | 0,10      | BEX2      | 0,32      | THBS1        | 0,40      | LOC402644    | 0,46      |           |           |
| EFEMP1                                                                                                                      | 0,11      | USP18     | 0,33      | IGFBP1       | 0,40      | PNPO         | 0,46      |           |           |
| IFIT2                                                                                                                       | 0,11      | SCPEP1    | 0,33      | KRT7         | 0,40      | COQ2         | 0,46      |           |           |
| HLA-DPA1                                                                                                                    | 0,11      | SLC12A2   | 0,33      | ZFP36        | 0,40      | STYXL1       | 0,46      |           |           |
| IFIT3                                                                                                                       | 0,13      | P2RY5     | 0,33      | LTB          | 0,40      | LAMC2        | 0,47      |           |           |
| PVRL3                                                                                                                       | 0,13      | HIST3H2A  | 0,33      | TRIM22       | 0,41      | TBC1D2       | 0,47      |           |           |
| CXCL9                                                                                                                       | 0,13      | UBE2L6    | 0,33      | AK2          | 0,41      | LGALS9       | 0,47      |           |           |
| HERC5                                                                                                                       | 0,14      | TXNDC14   | 0,33      | IFIH1        | 0,41      | LHFPL4       | 0,47      |           |           |
| RARRES3                                                                                                                     | 0,15      | IRF9      | 0,33      | LGALS3       | 0,41      | PSMB10       | 0,47      |           |           |
| EEF1A2                                                                                                                      | 0,15      | KCNK1     | 0,33      | HIST2H2AA4   | 0,41      | C10orf47     | 0,47      |           |           |
| IL8                                                                                                                         | 0,16      | TGFB2     | 0,34      | NCK1         | 0,41      | PROS1        | 0,47      |           |           |
| RSAD2                                                                                                                       | 0,16      | PDGFC     | 0,34      | SPNS2        | 0,41      | TMEM49       | 0,47      |           |           |
| TACSTD2                                                                                                                     | 0,17      | CTSH      | 0,34      | C1RL         | 0,41      | TAF12        | 0,47      |           |           |
| CDH6                                                                                                                        | 0,18      | NDUFS7    | 0,34      | ANXA8L2      | 0,41      | BCKDHA       | 0,47      |           |           |
| KRT19                                                                                                                       | 0,18      | PTGS2     | 0,34      | C14orf37     | 0,41      | C19orf33     | 0,47      |           |           |
| FAM65C                                                                                                                      | 0,19      | GABRP     | 0,35      | ZNFX1        | 0,41      | CASK         | 0,47      |           |           |
| JAM3                                                                                                                        | 0,19      | SNORD80   | 0,35      | EPST11       | 0,41      | MED19        | 0,47      |           |           |
| CLDN11                                                                                                                      | 0,19      | ESM1      | 0,35      | AMY1A        | 0,42      | CD58         | 0,47      |           |           |
| DDX60                                                                                                                       | 0,19      | TMEM51    | 0,35      | GFRA1        | 0,42      | HLA-B        | 0,48      |           |           |
| PLSCR4                                                                                                                      | 0,19      | SFTA2     | 0,35      | IFI6         | 0,42      | LOC387882    | 0,48      |           |           |
| IFITM1                                                                                                                      | 0,20      | C11orf70  | 0,36      | TLE4         | 0,42      | AFAP1L2      | 0,48      |           |           |
| FGFBP1                                                                                                                      | 0,20      | CST6      | 0,36      | LOC100130775 | 0,42      | CREG1        | 0,48      |           |           |
| TGFA                                                                                                                        | 0,21      | CXCL1     | 0,36      | PIR          | 0,42      | IGFBP6       | 0,48      |           |           |
| OAS2                                                                                                                        | 0,21      | FOS       | 0,36      | ACP6         | 0,42      | PIGM         | 0,48      |           |           |
| HERC6                                                                                                                       | 0,21      | RHPN2     | 0,36      | NFKBIZ       | 0,42      | ANPEP        | 0,48      |           |           |
| GPR110                                                                                                                      | 0,21      | KITLG     | 0,37      | MLPH         | 0,42      | GMPS         | 0,48      |           |           |
| IFI44                                                                                                                       | 0,21      | DDIT4     | 0,37      | CUTC         | 0,42      | MAPBPIP      | 0,48      |           |           |
| EHF                                                                                                                         | 0,22      | RGL1      | 0,37      | LOC644350    | 0,42      | GBA          | 0,48      |           |           |
| PARP9                                                                                                                       | 0,22      | PARP14    | 0,37      | ITGB5        | 0,43      | PLK2         | 0,48      |           |           |
| RBM47                                                                                                                       | 0,23      | RPS7      | 0,37      | PRIC285      | 0,43      | NBL1         | 0,48      |           |           |
| SNTB1                                                                                                                       | 0,23      | MORC4     | 0,37      | TMEM173      | 0,43      | LAP3         | 0,48      |           |           |
| EPAS1                                                                                                                       | 0,24      | SAMD9L    | 0,37      | LGALS3BP     | 0,43      | WWC1         | 0,48      |           |           |
| LEPREL1                                                                                                                     | 0,24      | LAD1      | 0,37      | ARV1         | 0,43      | ROR1         | 0,48      |           |           |
| TINAGL1                                                                                                                     | 0,24      | FADS1     | 0,37      | DDIT4L       | 0,44      | TMEM147      | 0,48      |           |           |
| TM4SF18                                                                                                                     | 0,24      | MX2       | 0,37      | TMED1        | 0,44      | CEBPD        | 0,49      |           |           |
| LOC728285                                                                                                                   | 0,24      | ECH1      | 0,37      | LIMCH1       | 0,44      | SIL1         | 0,49      |           |           |
| DHRS3                                                                                                                       | 0,25      | CLDN1     | 0,37      | ID1          | 0,44      | DYNLL2       | 0,49      |           |           |
| KRT81                                                                                                                       | 0,25      | CGN       | 0,37      | DTX3         | 0,44      | LPHN2        | 0,49      |           |           |
| MPZL2                                                                                                                       | 0,25      | TGM2      | 0,38      | LOC100129681 | 0,44      | FAM176A      | 0,49      |           |           |
| HLA-DMA                                                                                                                     | 0,25      | HLA-DRB4  | 0,38      | HIST2H2AA3   | 0,44      | LXN          | 0,49      |           |           |
| ADRB2                                                                                                                       | 0,26      | PRRT3     | 0,38      | C11orf48     | 0,44      | SNORD104     | 0,49      |           |           |
| LOC730415                                                                                                                   | 0,26      | RTP4      | 0,38      | DHX58        | 0,44      | MRPS12       | 0,49      |           |           |
| STAT1                                                                                                                       | 0,27      | EPHX1     | 0,38      | TMEM166      | 0,44      | NOP56        | 0,49      |           |           |
| IFI35                                                                                                                       | 0,27      | ALDH3A1   | 0,38      | ETFB         | 0,44      | LOXL4        | 0,49      |           |           |
| CACNG6                                                                                                                      | 0,27      | NIT2      | 0,38      | CXCL6        | 0,44      | LMO4         | 0,49      |           |           |
| C3orf72                                                                                                                     | 0,27      | TNFRSF21  | 0,38      | HIST2H2AC    | 0,44      | ZBTB20       | 0,49      |           |           |
| OAS3                                                                                                                        | 0,28      | PPM2C     | 0,38      | H1FO         | 0,45      | C12orf57     | 0,49      |           |           |
| PLSCR1                                                                                                                      | 0,28      | LOC374395 | 0,38      | SLC1A1       | 0,45      | RNU6-15      | 0,49      |           |           |
| LCN2                                                                                                                        | 0,28      | TNFRSF11B | 0,38      | TRIB3        | 0,45      | SARS2        | 0,49      |           |           |
| FGF2                                                                                                                        | 0,29      | CDKN2C    | 0,39      | MRPL54       | 0,45      | ZMAT2        | 0,49      |           |           |
| C1orf85                                                                                                                     | 0,29      | POP4      | 0,39      | CXCR4        | 0,45      | PDCD2L       | 0,49      |           |           |
| HLA-DMB                                                                                                                     | 0,29      | CBLB      | 0,39      | HIST1H2AC    | 0,45      | OCEL1        | 0,49      |           |           |
